# Supplementary material
Source: ML conference proceedings conference paper supplement (https://proceedings.mlr.press/v54/arabshahi17a.html)
Supplement: Supplementary file [file arabshahi17a-supp.pdf]

## Appendix

**Proof of Theorem 1** *Proof:* The moment form of Lemma 1 can be represented as [18],

$$\begin{aligned} \mathbb{E}(h_1^{r_1} h_2^{r_2} \dots h_n^{r_n}) = \\ \frac{1}{\Gamma(r)} \int_0^\infty u^{r-1} e^{-\sum_{i=n+1}^k \Psi_i(u)} \prod_{j \in [n]} (-1)^{r_j} \frac{d^{r_j}}{du^{r_j}} e^{-\Psi_j(u)} du. \end{aligned} \quad (19)$$

We use the above general form of the moments to compute and diagonalize the following moment tensors,

$$\begin{aligned} \mathbf{M}_2^{(\mathbf{h})} &= \mathbb{E}(\mathbf{h} \otimes \mathbf{h}) + \eta \mathbb{E}(\mathbf{h}) \otimes \mathbb{E}(\mathbf{h}), \quad (20) \\ \mathbf{M}_3^{(\mathbf{h})} &= \mathbb{E}(\mathbf{h} \otimes \mathbf{h} \otimes \mathbf{h}) \\ &\quad + \eta_1 \mathbb{E}(\mathbf{h} \otimes \mathbf{h}) \otimes \mathbb{E}(\mathbf{h}) \\ &\quad + \eta_2 \mathbb{E}(\mathbf{h} \otimes \mathbb{E}(\mathbf{h}) \otimes \mathbf{h}) \\ &\quad + \eta_3 \mathbb{E}(\mathbf{h}) \otimes \mathbb{E}(\mathbf{h} \otimes \mathbf{h}) \\ &\quad + \eta_4 \mathbb{E}(\mathbf{h}) \otimes \mathbb{E}(\mathbf{h}) \otimes \mathbb{E}(\mathbf{h}). \quad (21) \end{aligned}$$

Setting the off-diagonal entries of Equations (20) and (21) to 0 and get the following set of equations

$$\begin{aligned} \mathbb{E}(h_i h_j) + \eta \mathbb{E}(h_i) \mathbb{E}(h_j) &= 0 \quad \text{for } i \neq j, \quad (22) \\ \mathbb{E}(h_i h_j h_l) \\ &\quad + \eta_1 \mathbb{E}(h_i h_j) \mathbb{E}(h_l) \\ &\quad + \eta_2 \mathbb{E}(h_i h_l) \mathbb{E}(h_j) \\ &\quad + \eta_3 \mathbb{E}(h_j h_l) \mathbb{E}(h_i) \\ &\quad + \eta_4 \mathbb{E}(h_i) \mathbb{E}(h_j) \mathbb{E}(h_l) = 0 \\ &\quad \text{for } i \neq j \neq l = 0, \quad (23) \end{aligned}$$

$$\begin{aligned} \mathbb{E}(h_i^2 h_l) \\ &\quad + \eta_1 \mathbb{E}(h_i^2) \mathbb{E}(h_l) \\ &\quad + \eta_2 \mathbb{E}(h_i h_l) \mathbb{E}(h_i) \\ &\quad + \eta_3 \mathbb{E}(h_i h_l) \mathbb{E}(h_i) \\ &\quad + \eta_4 \mathbb{E}(h_i) \mathbb{E}(h_i) \mathbb{E}(h_l) = 0 \\ &\quad \text{for } i \neq l. \quad (24) \end{aligned}$$

Writing the moments using Equation (19), assuming  $\Phi_i(u) = \alpha_i \Psi(u)$ , we get the following weights by some simple algebraic manipulations,

$$\eta = \frac{\int_0^\infty u e^{-\alpha_0 \Psi(u)} \left( \frac{d}{du} \Psi(u) \right)^2 du}{\left( \int_0^\infty e^{-\alpha_0 \Psi(u)} \frac{d}{du} \Psi(u) du \right)^2} \quad (25)$$

$$\eta_1 = \eta_2 = \eta_3$$

$$\begin{aligned} &\frac{1}{2} \int_0^\infty u^2 e^{-\alpha_0 \Psi(u)} \frac{d^2}{du^2} \Psi(u) \frac{d}{du} \Psi(u) du \\ &= - \frac{\int_0^\infty u e^{-\alpha_0 \Psi(u)} \frac{d^2}{du^2} \Psi(u) du \int_0^\infty e^{-\alpha_0 \Psi(u)} \frac{d}{du} \Psi(u) du}{\int_0^\infty u e^{-\alpha_0 \Psi(u)} \frac{d^2}{du^2} \Psi(u) du \int_0^\infty e^{-\alpha_0 \Psi(u)} \frac{d}{du} \Psi(u) du} \quad (26) \end{aligned}$$

$$\eta_4 = \frac{f(\psi(u))}{\left( \int_0^\infty e^{-\alpha_0 \Psi(u)} \frac{d}{du} \Psi(u) du \right)^3} \quad (27)$$

Where

$$\begin{aligned} f(\psi(u)) &= -\frac{1}{2} \int_0^\infty u^2 e^{-\alpha_0 \Psi(u)} \left( \frac{d}{du} \Psi(u) \right)^3 du \\ &\quad + (\eta_1 + \eta_2 + \eta_3) \int_0^\infty u e^{-\alpha_0 \Psi(u)} \left( \frac{d}{du} \Psi(u) \right)^2 du \\ &\quad \cdot \int_0^\infty e^{-\alpha_0 \Psi(u)} \frac{d}{du} \Psi(u) du \quad (28) \end{aligned}$$

Setting  $v = \eta$ ,  $v_1 = \eta_1 = \eta_2 = \eta_3$  and  $v_2 = \eta_4$  and defining

$$\Omega(m, n, p) := \int_0^\infty u^m \frac{d^n}{du^n} \Psi(u) \left( \frac{d}{du} \Psi(u) \right)^p e^{-\alpha_0 \Psi(u)} du, \quad (29)$$

the set of weights  $v$ ,  $v_1$  and  $v_2$  have the following form,

$$v = \frac{\Omega(1, 1, 1)}{\left( \Omega(0, 1, 0) \right)^2}, \quad (30)$$

$$v_1 = -\frac{\Omega(2, 2, 1)}{2\Omega(1, 2, 0)\Omega(0, 1, 0)}, \quad (31)$$

$$v_2 = \frac{-0.5\Omega(2, 1, 2) + 3v_1\Omega(1, 1, 1)\Omega(0, 1, 0)}{\left( \Omega(0, 1, 0) \right)^3}. \quad (32)$$

$$(33)$$

Weights  $v$ ,  $v_1$  and  $v_2$  ensure that moment tensors  $\mathbf{M}_2^{(\mathbf{h})}$  and  $\mathbf{M}_3^{(\mathbf{h})}$  form diagonal tensors. Therefore they can be represented as,

$$\mathbf{M}_2^{(\mathbf{h})} = \sum_{i \in [k]} \kappa_i \mathbf{e}_i^{\otimes 2}, \quad (34)$$

$$\mathbf{M}_3^{(\mathbf{h})} = \sum_{i \in [k]} \lambda_i \mathbf{e}_i^{\otimes 3}, \quad (35)$$

where,

$$\kappa_i = \mathbb{E}[h_i^2] + v \mathbb{E}[h_i]^2, \quad (36)$$

$$\lambda_i = \mathbb{E}[h_i^3] + 3v_1 (\mathbb{E}[h_i^2] \mathbb{E}[h_i]) + v_2 (\mathbb{E}[h_i]^3). \quad (37)$$

The exchangeability assumption on the word space gives,

$$\mathbb{E}[\mathbf{x}_1] = \mathbb{E}(\mathbb{E}[\mathbf{x}_1 | \mathbf{h}]) = \mathbf{A} \mathbb{E}(\mathbf{h}), \quad (38)$$

$$\mathbb{E}[\mathbf{x}_1 \otimes \mathbf{x}_2] = \mathbb{E}(\mathbb{E}[\mathbf{x}_1 \otimes \mathbf{x}_2 | \mathbf{h}]) = \mathbf{A} \mathbb{E}(\mathbf{h} \otimes \mathbf{h}) \mathbf{A}^\top, \quad (39)$$

$$\begin{aligned}\mathbb{E}[\mathbf{x}_1 \otimes \mathbf{x}_2 \otimes \mathbf{x}_3] &= \mathbb{E}(\mathbb{E}[\mathbf{x}_1 \otimes \mathbf{x}_2 \otimes \mathbf{x}_3 | \mathbf{h}]) \\ &= \mathbb{E}[\mathbf{h} \otimes \mathbf{h} \otimes \mathbf{h} | \mathbf{A}, \mathbf{A}, \mathbf{A}].\end{aligned}\quad (40)$$

Therefore,

$$\mathbf{M}_2 = \mathbf{A} \mathbf{M}_2^{(\mathbf{h})} \mathbf{A}^\top = \sum_{j \in [k]} \kappa_j (\mathbf{a}_j \otimes \mathbf{a}_j), \quad (41)$$

$$\mathbf{M}_3 = \mathbf{M}_3^{(\mathbf{h})}(\mathbf{A}, \mathbf{A}, \mathbf{A}) = \sum_{j \in [k]} \lambda_j (\mathbf{a}_j \otimes \mathbf{a}_j \otimes \mathbf{a}_j) \quad (42)$$

□

## Extended results

Table 4: NID Top 10 Words for NYtimes, K = 20

| Topic | Top Words in descending order of importance                                                                              |
|-------|--------------------------------------------------------------------------------------------------------------------------|
| 1     | seeded, soldier, firestone, bobby-braswell, michigan-state, actresses, gary-william, preview, school-district, netanyahu |
| 2     | diane, question, newspaper, copy, fall, held, tonight, send, guard, slugged                                              |
| 3     | abides, acclimate, acetate, alderman, analogues, annexing, ansar, antitax, antitobacco, argyle                           |
| 4     | percent, school, quarter, company, taliban, high, stock, race, companies, john-mccain                                    |
| 5     | test, deal, contract, tiger-wood, question, houston-chronicle, copy, won, seattle-post-intelligencer ,tax                |
| 6     | tonight, diane, question, newspaper, file, copy, fall, slugged, onlytest, xxx                                            |
| 7     | company, com, market, stock, won, los-angeles-daily-new, business, eastern, web, commentary                              |
| 8     | abides, acclimate, acetate, alderman, analogues, annexing, ansar, antitax, antitobacco, argyle                           |
| 9     | company, game, run, los-angeles-daily-new, percent, team, season, stock, companies, games                                |
| 10    | working-girl, abides, acclimate, acetate, alderman, analogues, annexing, ansar, antitax, antitobacco                     |
| 11    | diane, newspaper, fall, tonight, question, held, copy, bush, slugged, police                                             |
| 12    | hurricanes, policies, surgery, productivity, courageous, emergency, singapore, orange-bowl, regarding, telecast          |
| 13    | abides, acclimate, acetate, alderman, analogues, annexing, ansar, antitax, antitobacco, argyle                           |
| 14    | company, com, won, stock, market, eastern, commentary, business, web, deal                                               |
| 15    | company, stock, market, business, investor, technology, analyst, cash, sell, executives                                  |
| 16    | tonight, question, diane, file, newspaper, copy, fall, slugged, onlytest, xxx                                            |
| 17    | defense, held, children, fight, assistant, surgery, michael-bloomberg, worker, bird, omar                                |
| 18    | percent, company, stock, companies, quarter, school, market, analyst, high, corp                                         |
| 19    | school, student, yard, released, guard, premature, teacher, touchdown, publication, leader                               |
| 20    | school, percent, student, yard, high, taliban, flight, air, afghanistan, plan                                            |

Table 5: NID top 10 Words for Pubmed, K = 10

| Topic | Top Words in descending order of importance                                                                                           |
|-------|---------------------------------------------------------------------------------------------------------------------------------------|
| 1     | protein, region, dna, family, sequence, gene, form-12, analysis.abstract, model, tumoural                                             |
| 2     | cell, mice.abstract, expression.abstract, activity.abstract, primary, tumor, antigen, human, t-cell, vitro                            |
| 3     | tumor, treatment, receptor, lesional, children-a, effect.abstract, factor, rat1, renal-cell, response-1                               |
| 4     | patient, treatment, therapy, clinical, disease, level.abstract, effect.abstract, treated, tumor, surgery                              |
| 5     | activity.abstract, rat1, concentration, dna, human, effect.abstract, exposure.abstract, animal-based, reactional, inhibition.abstract |
| 6     | patient, children-a, women.abstract, treatment, level.abstract, syndrome, disordered, disease, year-1, therapy                        |
| 7     | effect.abstract, receptor, level.abstract, rat1, mutational, gene, concentration, women.abstract, insulin, expression.abstract        |
| 8     | acid, strain, concentration, women.abstract, test, pregnancy-a, drug, system-a, function.abstract, water                              |
| 9     | strain, protein, system-a, muscle, mutational, species, growth, diagnosis-based, analysis.abstract, gene                              |
| 10    | infection.abstract, hospital, programed, strain, medical, alpha, information, health, children-a, data.abstract                       |

Table 6: Spectral LDA top 10 Words for NYtimes, K = 20

| Topic | Top Words in descending order of importance                                                                                |
|-------|----------------------------------------------------------------------------------------------------------------------------|
| 1     | newspaper, question, copy, fall, diane, chante-lagon, kill, mandatory, drug, patient                                       |
| 2     | held, guard, send, publication, released, advisory, premature, attn-editor, undatelined, washington-datelined              |
| 3     | los-angeles-daily-new, slugged, com, xxx, www, x-x-x, web, information, site, eastern                                      |
| 4     | million, shares, offering, boston-globe, debt, public, initial, player, bill, contract                                     |
| 5     | onlytest, point, tax, case, court, lawyer, police, minutes, death, shot                                                    |
| 6     | held, released, publication, guard, advisory, premature, send, attn-editor, undatelined, washington-datelined              |
| 7     | com, information, www, web, eastern, daily, commentary, business, separate, marked                                         |
| 8     | boston-globe, spot, file, killed, tonight, women, earlier, article, george-bush, incorrectly                               |
| 9     | million, shares, offering, debt, public, initial, player, contract, bond, revenue                                          |
| 10    | boston-globe, spot, file, held, killed, attn-editor, earlier, article, court, women                                        |
| 11    | percent, market, stock, point, quarter, economy, rate, women, growth, companies                                            |
| 12    | boston-globe, spot, file, tonight, killed, earlier, article, women, incorrectly, news-feature                              |
| 13    | held, guard, publication, released, send, advisory, premature, attn-editor, undatelined, washington-datelined              |
| 14    | los-angeles-daily-new, slugged, xxx, new-york, x-x-x, fund, bush, goal, king, evening                                      |
| 15    | tonight, copy, question, diane, fall, newspaper, russia, terrorist, russian, black                                         |
| 16    | slugged, los-angeles-daily-new, xxx, new-york, x-x-x, bush, run, school, inning, student                                   |
| 17    | onlytest, file, film, onlyendpar, movie, new-york, seattle-pi, los-angeles, sport, patient                                 |
| 18    | los-angeles-daily-new, slugged, xxx, x-x-x, student, inning, send, program, enron, game                                    |
| 19    | los-angeles-daily-new, slugged, xxx, new-york, x-x-x, fund, evening, program, student, enron                               |
| 20    | test, houston-chronicle, hearst-news-service, seattle-post-intelligencer, ignore, patient, kansas-city, yard, race, doctor |

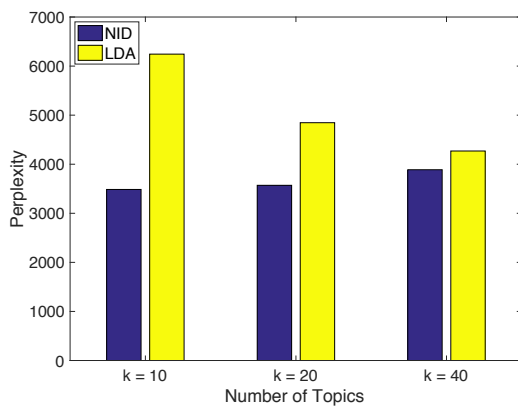

(a) Perplexity score

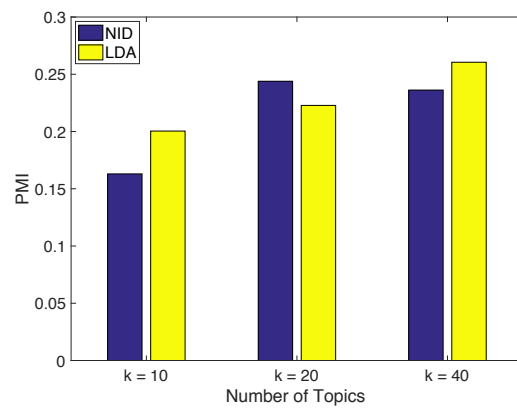

(b) Pointwise Mutual Information (PMI)

Figure 5: Perplexity and PMI scores for the NYtimes dataset across different number of topics
